# Supplementary material
Source: Springer Nature journal article supplement (https://www.springermedizin.de/resource/supplementary/12875_2009_385_MOESM3_ESM.pdf/9434502)

**Problems experienced**

**Strategy used**

**Objective**

**Making  
adequate decisions**

**Being constantly ready to  
change the goal of the  
treatment**

**Adequate decisions**

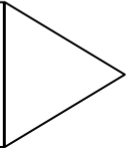

Supplement: MOESM3 [file 9434502]
